# Supplementary material for: An effective approach for modifying carbonaceous materials with niobium single sites to improve their catalytic properties
Source: Royal Society of Chemistry journal article supplement (doi:10.1039/c5dt03007b), 2015-01-01
Supplement: c5dt03007b1.pdf [file c5dt03007b1.pdf]

## Supplementary Information

### **An effective approach for modifying carbonaceous materials with niobium single sites to improve their catalytic properties**

A. S. Bozzi<sup>a</sup>, R. L. Lavall<sup>a</sup>, T. E. Souza<sup>a</sup>, M. C. Pereira<sup>b</sup>, P. P. de Souza<sup>c</sup>, H. A. De Abreu<sup>a</sup>, A.  
De Oliveira<sup>a</sup>, P. F. R. Ortega<sup>a</sup>, R. Paniago<sup>d</sup>, L. C. A. Oliveira<sup>a†</sup>

<sup>a</sup>Departament of Chemistry, Federal University of Minas Gerais, Av. Antonio Carlos 6627, Campus Pampulha, 31270-901, Belo Horizonte-MG, Brazil.

<sup>b</sup>Institute of Science, Engineering and Technology, Federal University of the Jequitinhonha and Mucuri Valleys, 39803-371, Teófilo Otoni- MG, Brazil .

<sup>c</sup>Departament of Chemisry, Federal Center Technological Education of Minas Gerais, CEFET-MG, Av. Amazonas 5243, 30421-169, Belo Horizonte-MG, Brazil..

<sup>d</sup>Departament of Physics, Federal University of Minas Gerais, Av. Antonio Carlos 6627, Campus Pampulha, 31270-901, Belo Horizonte-MG.

<sup>†</sup>E-mail: luizoliveira@qui.ufmg.br

**Figure S1.** Studied reactions to propose the most stable interaction model of the niobium complex with carbonaceous materials.

**Table S1:** Energetic variations<sup>(a)</sup> for the studied reactions<sup>(b)</sup>.

A.

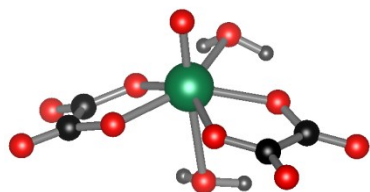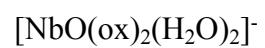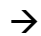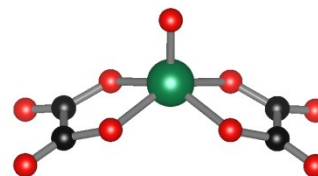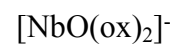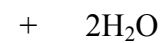

$$\Delta G^{\text{total}} = -7.8 \text{ kcal mol}^{-1}$$

B.

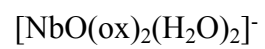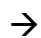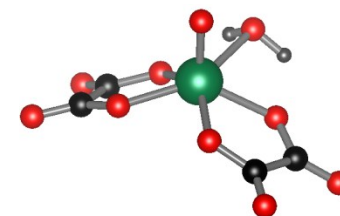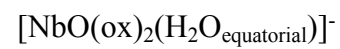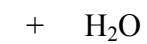

$$\Delta G^{\text{total}} = -4.2 \text{ kcal mol}^{-1}$$

C.

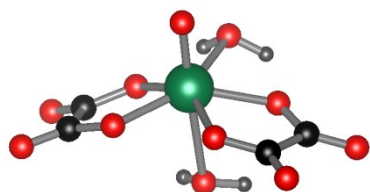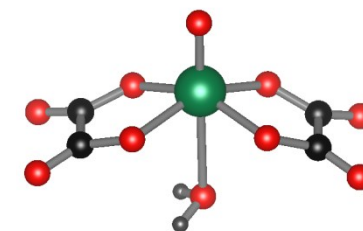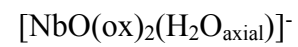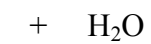

$$\Delta G^{\text{total}} = -3.0 \text{ kcal mol}^{-1}$$

Figure S1 continues in the next page.

D.

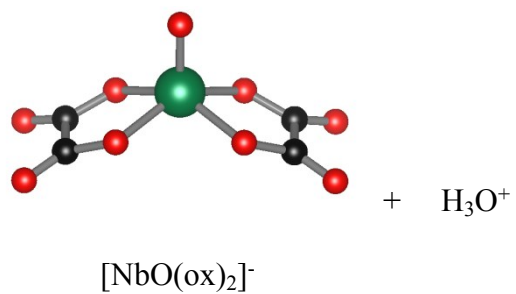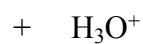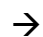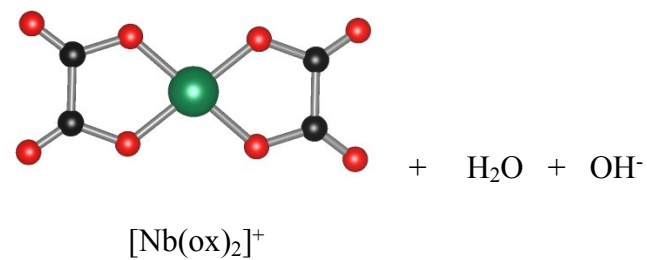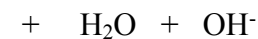

$\Delta G^{\text{total}} = 122.2 \text{ kcal mol}^{-1}$

E.

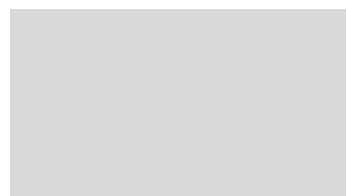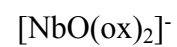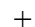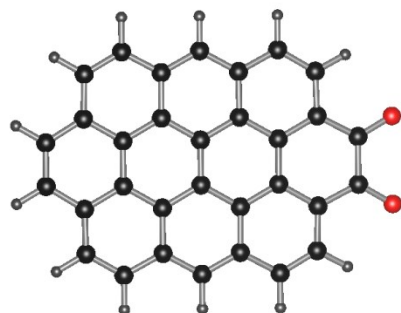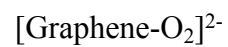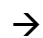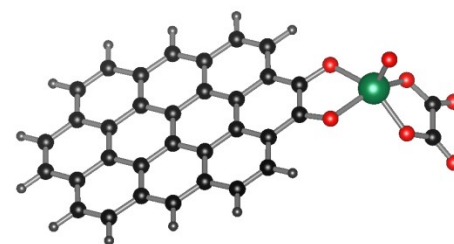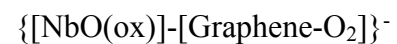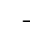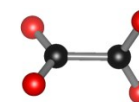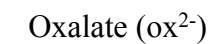

$\Delta G^{\text{total}} = 4.2 \text{ kcal mol}^{-1}$

F.

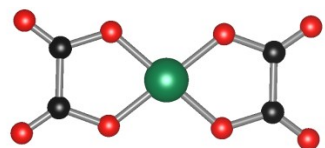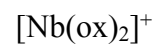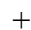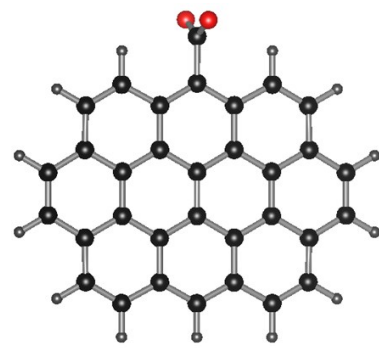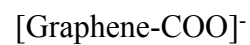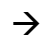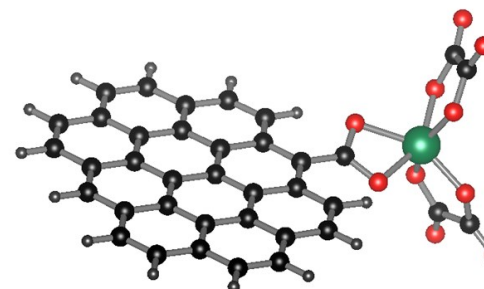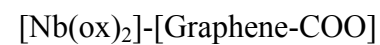

$\Delta G^{\text{total}} = -75.8 \text{ kcal mol}^{-1}$

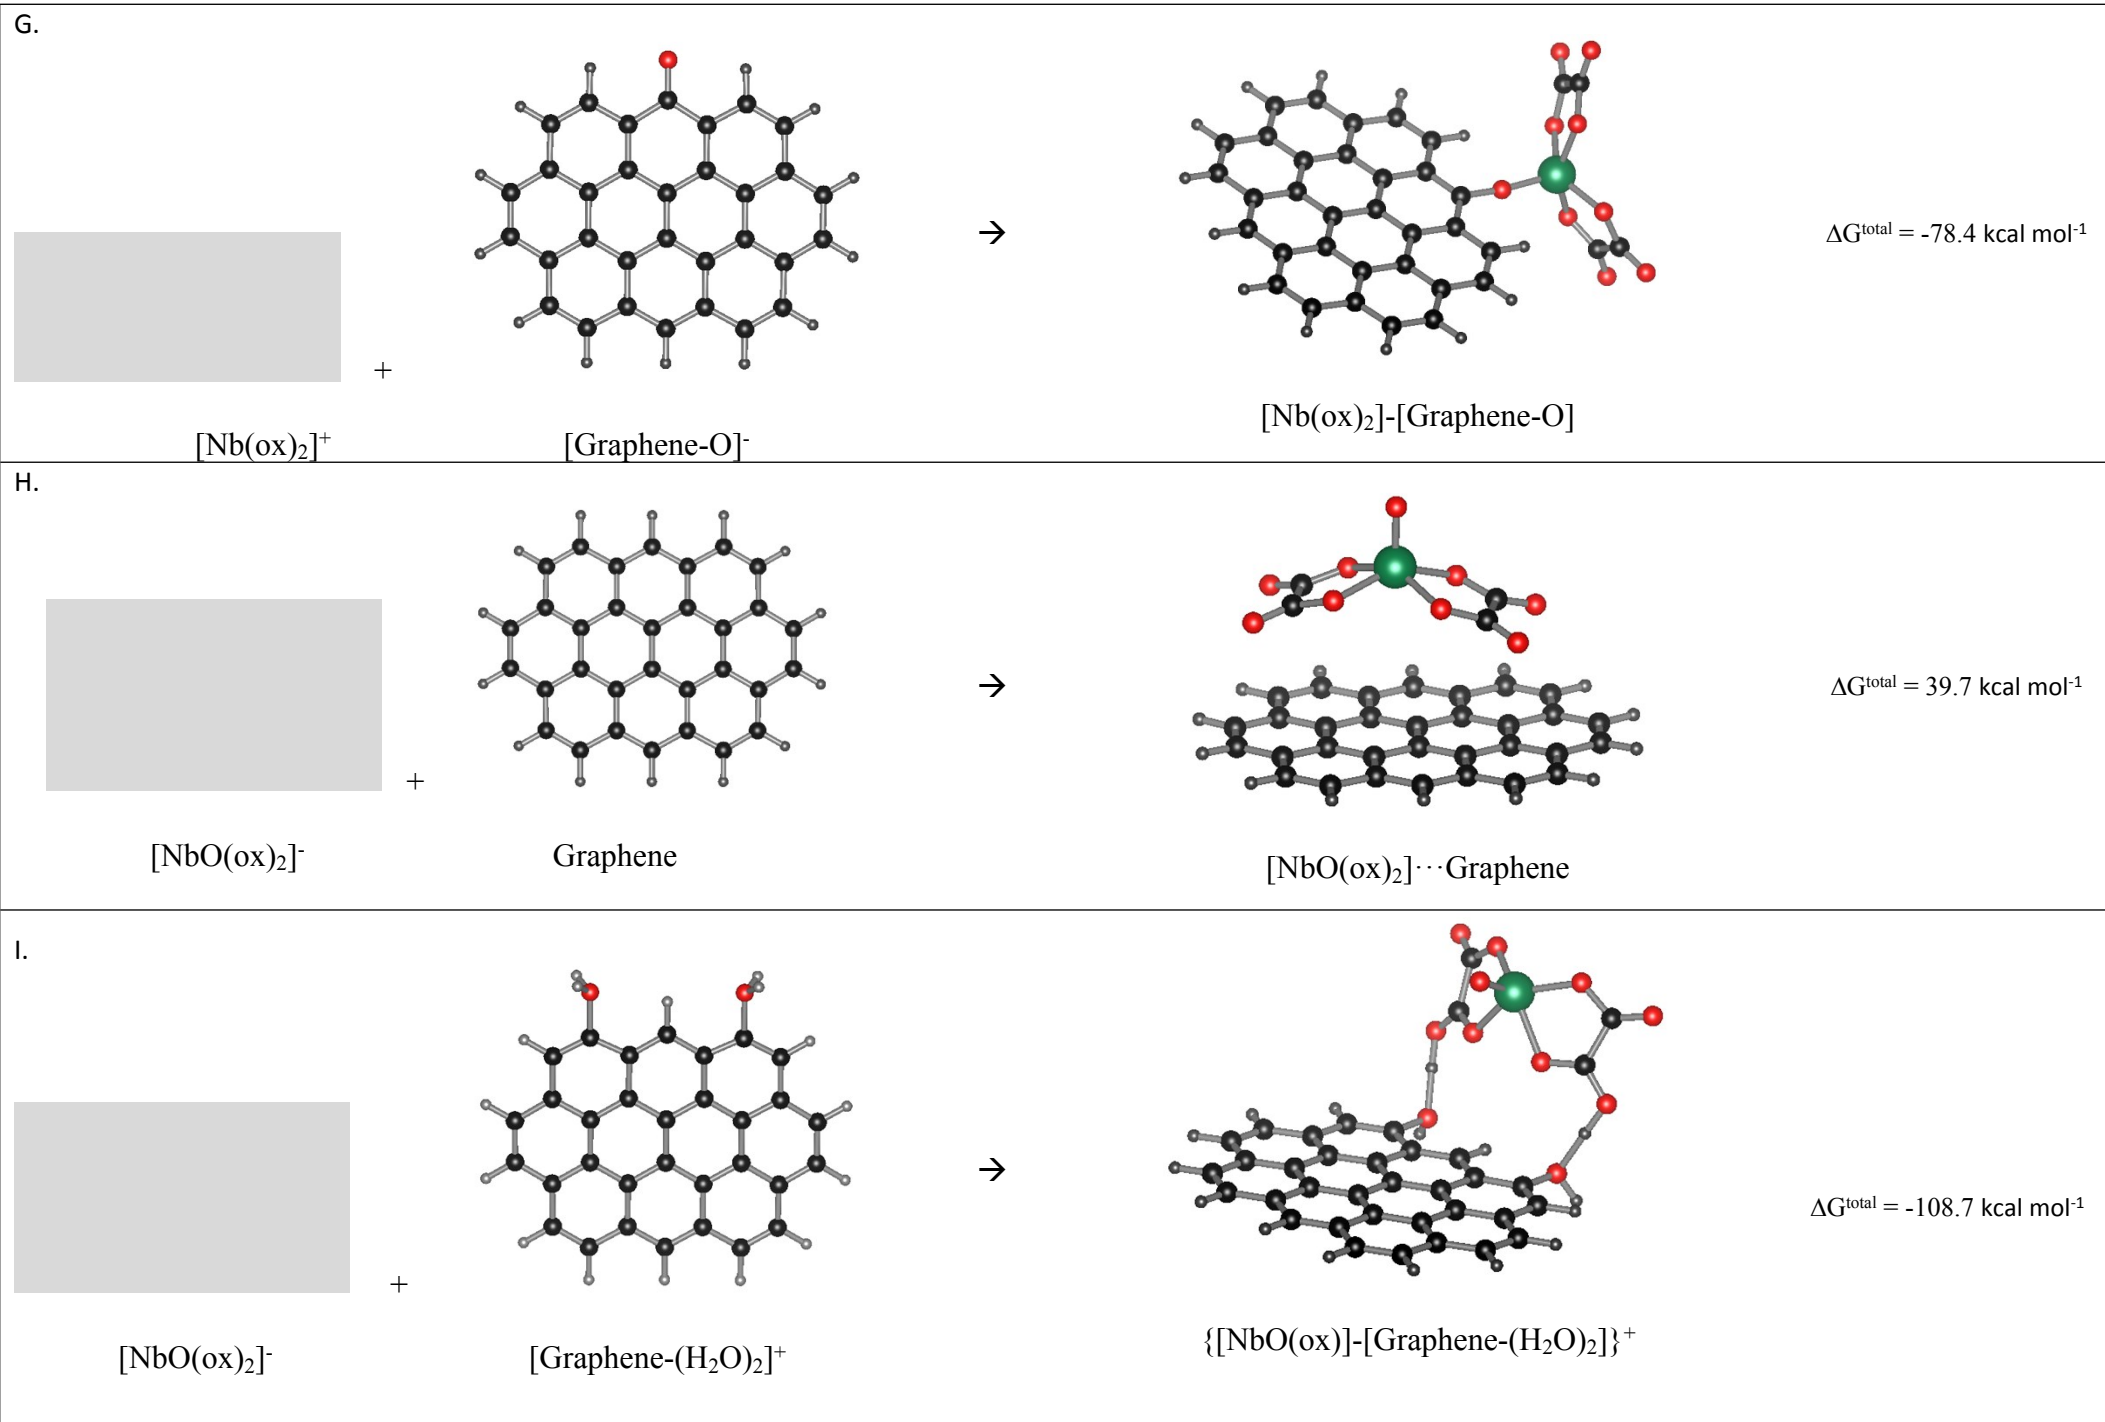

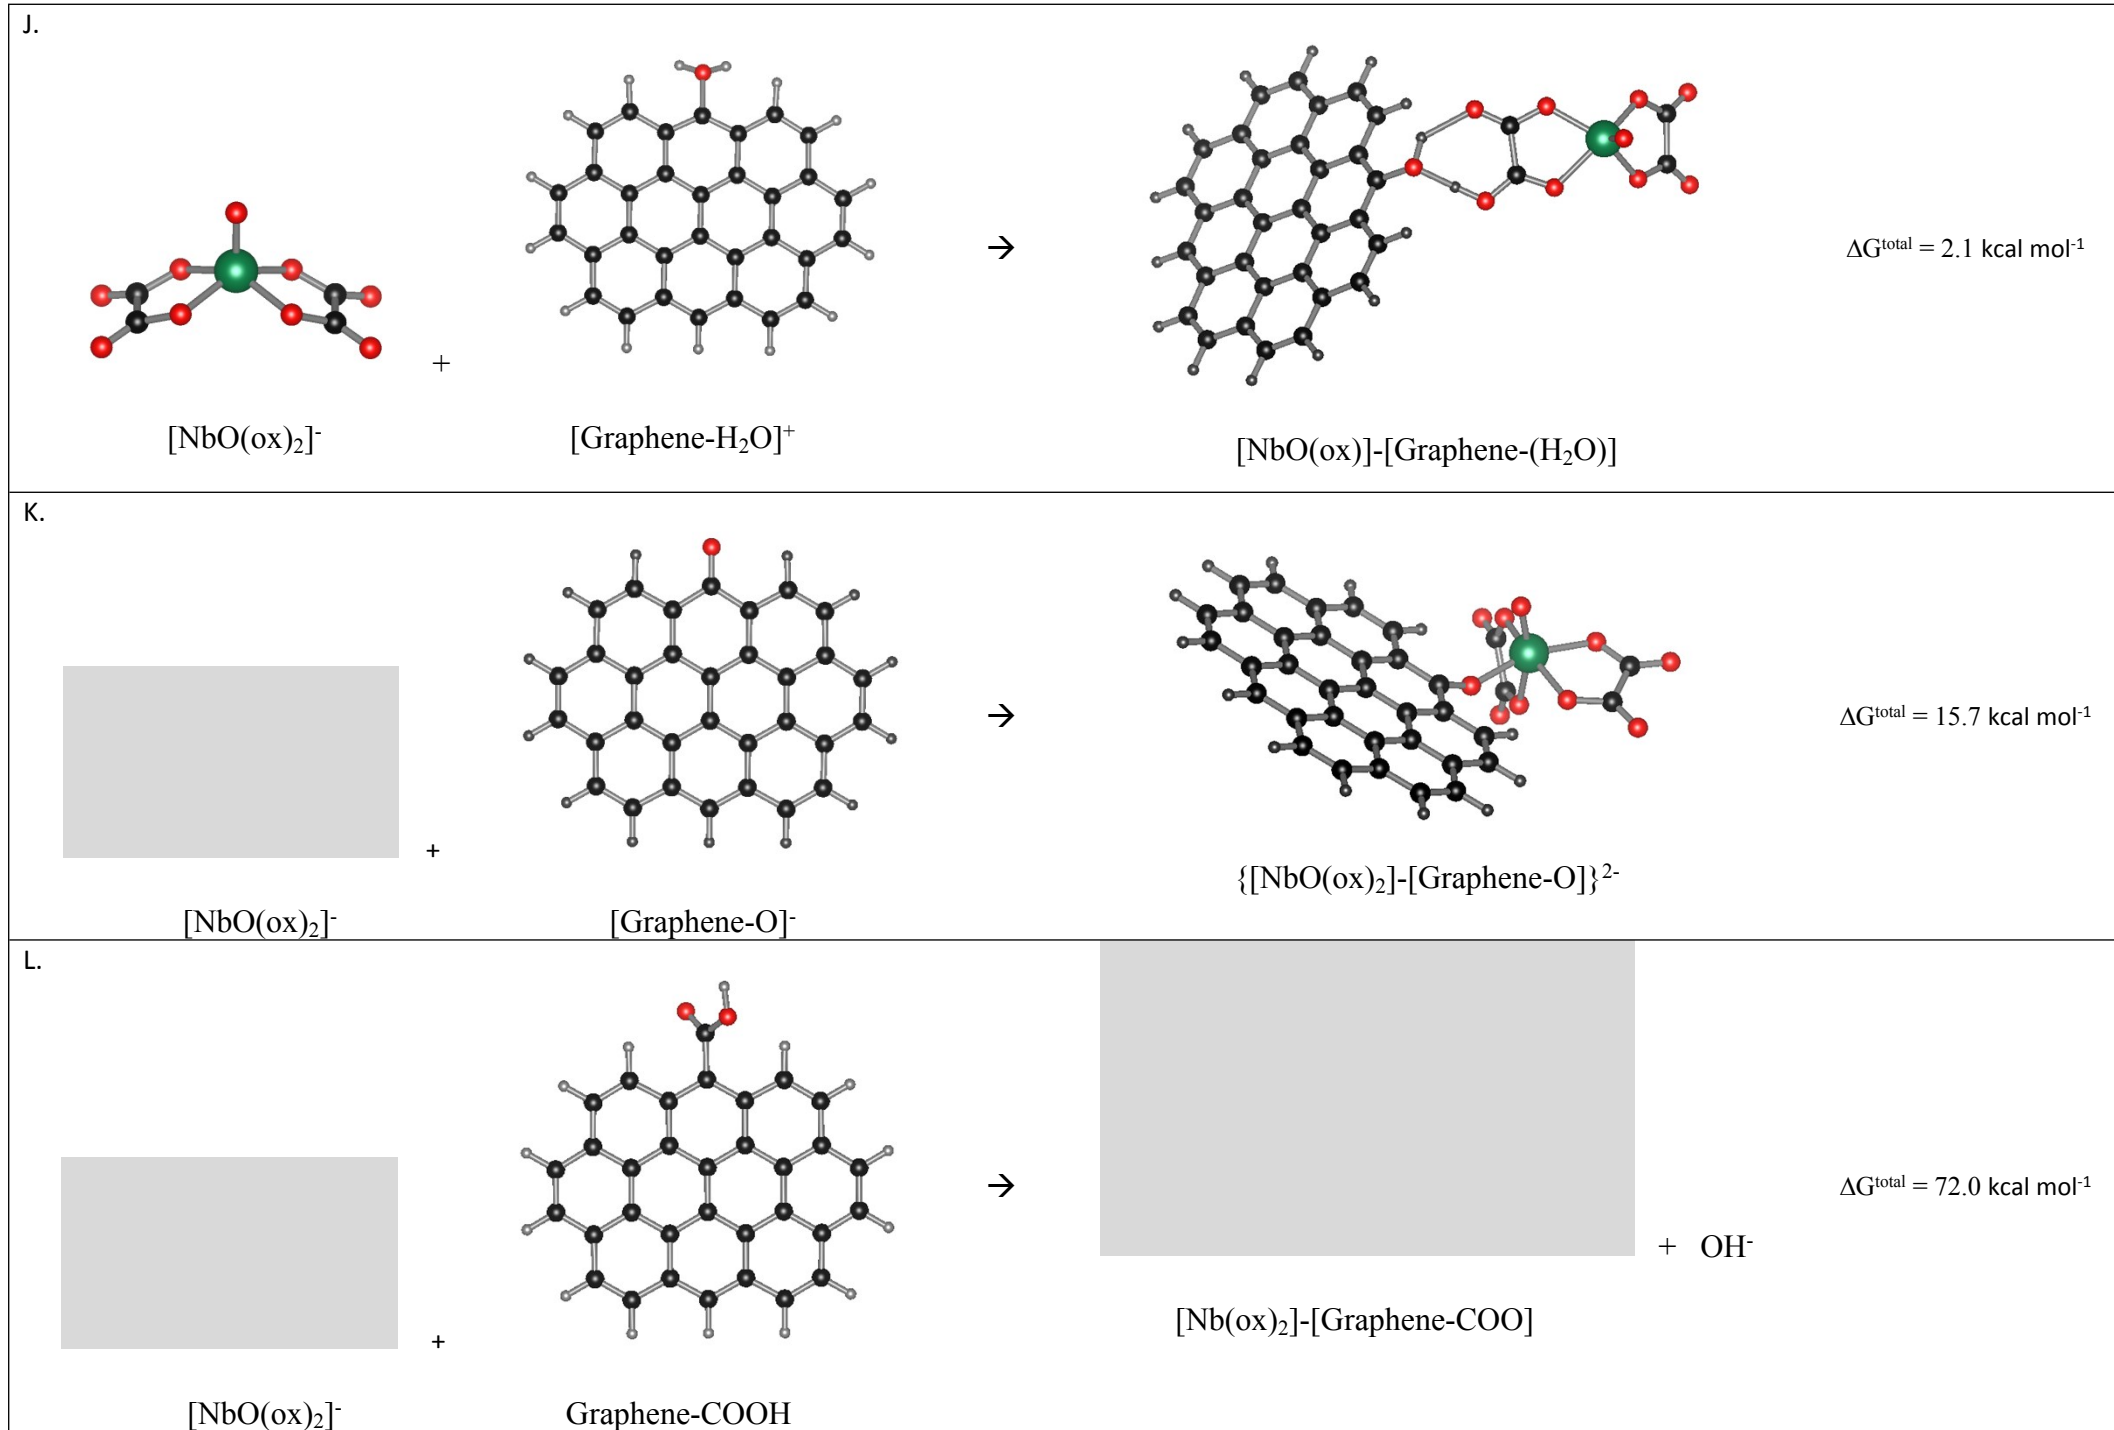

M.

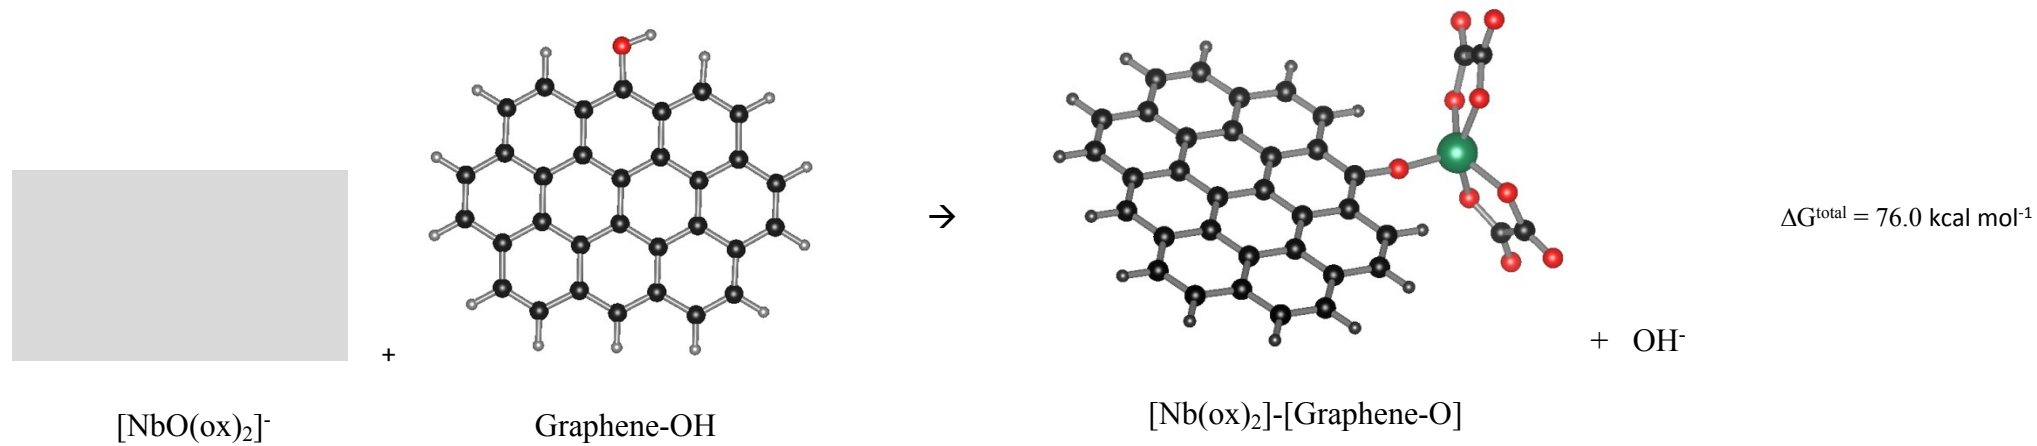

N.

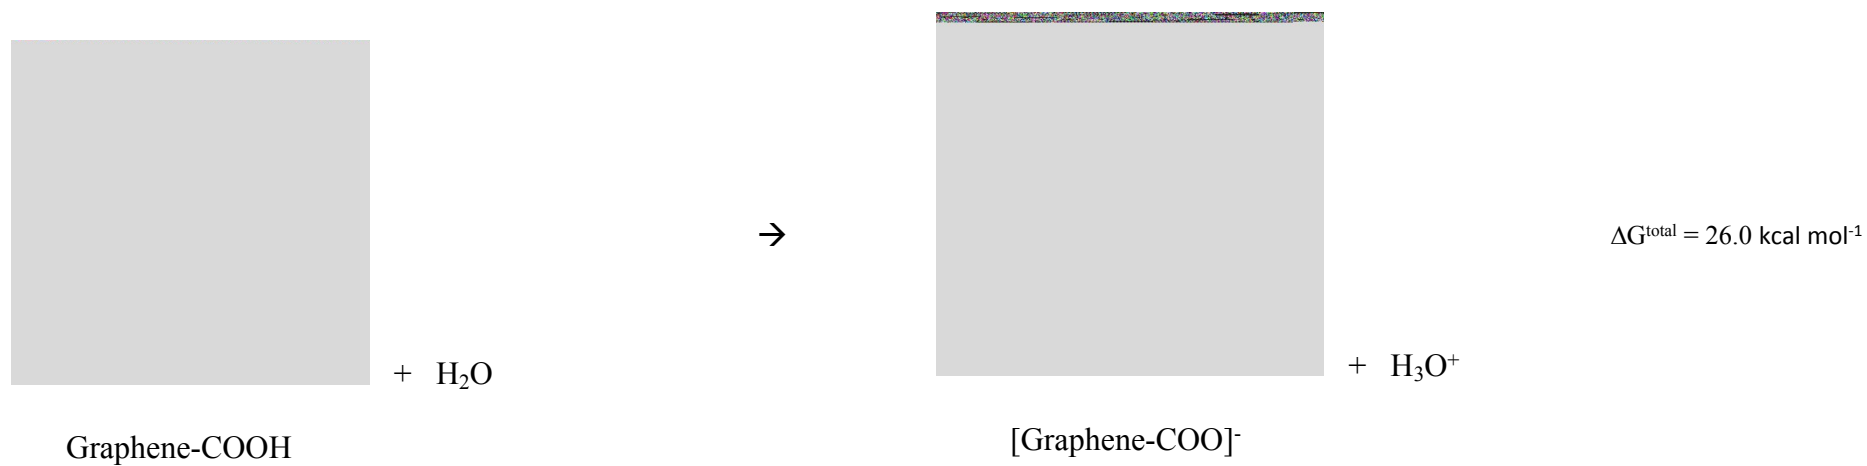

Figure S1 continues in the next page.

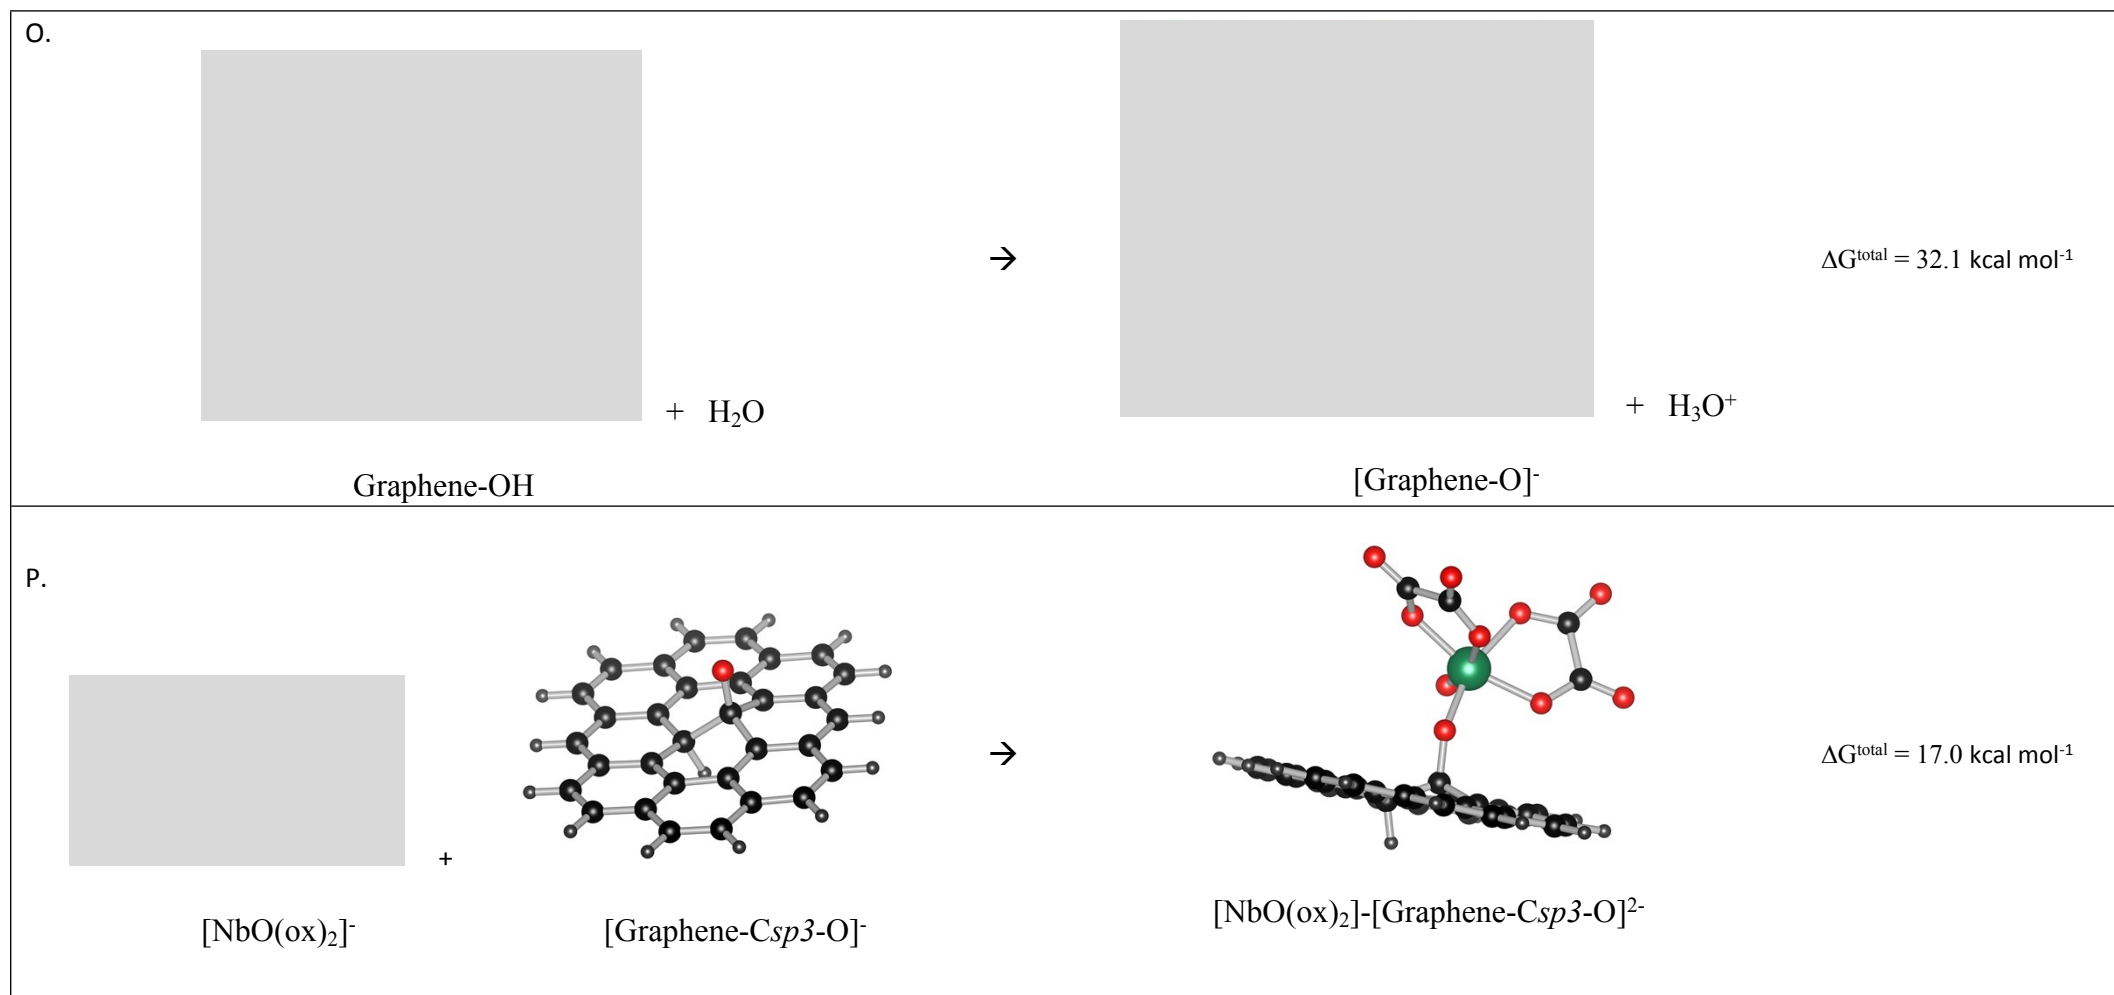

**Figure S1.** Studied reactions to propose the most stable interaction model of the niobium complex with carbonaceous materials. C (black), Nb (green), H (grey), O (red).

**Table S1:** Energetic variations<sup>(a)</sup> for the studied reactions<sup>(b)</sup>.

| Reaction | $\Delta E^{\text{ele}}$ | $\Delta G^{\text{term}}$ | $\Delta G^{\text{solv}}$ | $\Delta G^{\text{total}}$ |
|----------|-------------------------|--------------------------|--------------------------|---------------------------|
| A        | 14.0                    | -23.6                    | 1.8                      | -7.8                      |
| B        | 5.2                     | -10.8                    | 1.4                      | -4.2                      |
| C        | 7.4                     | -13.3                    | 2.9                      | -3.0                      |
| D        | 200.8                   | -14.4                    | -64.1                    | 122.2                     |
| E        | 60.6                    | 3.2                      | -59.6                    | 4.2                       |
| F        | -233.0                  | 17.1                     | 140.1                    | -75.8                     |
| G        | -222.4                  | 14.5                     | 129.5                    | -78.4                     |
| H        | 15.0                    | 12.6                     | 12.1                     | 39.7                      |
| I        | -168.5                  | 15.2                     | 44.6                     | -108.7                    |
| J        | -86.1                   | 13.1                     | 75.1                     | 2.1                       |
| K        | 40.4                    | 13.5                     | -38.2                    | 15.7                      |
| L        | 125.5                   | 0.2                      | -53.7                    | 72.0                      |
| M        | 129.3                   | -0.9                     | -52.4                    | 76.0                      |
| N        | 157.8                   | -2.5                     | -129.7                   | 25.6                      |
| O        | 150.9                   | -1.0                     | -117.8                   | 32.1                      |
| P        | 33.5                    | 14.0                     | -30.5                    | 17.0                      |

(a) Values in kcal mol<sup>-1</sup> estimated at 298.15 K. (b) The reactions are sketched in Figure S1.
